# Supplementary material for: Widespread Circulation of Tick-Borne Viruses in Virginia—Evidence of Exposure to Heartland, Bourbon, and Powassan Viruses in Wildlife and Livestock
Source: MDPI journal article supplement (doi:10.3390/microorganisms12050899), 2024-04-30
Supplement: s1 [file s1]

**Table S1:** List of species of all wildlife individuals sampled during the study. Note that, due to sample volume, not all individuals could be screened for exposure against all three tick-borne viruses.

| <b>Common name</b>          | <b>Species name</b>             | <b>Available number</b> |
|-----------------------------|---------------------------------|-------------------------|
| American robin              | <i>Turdus migratorius</i>       | 1                       |
| American beaver             | <i>Castor canadensis</i>        | 2                       |
| American black bear         | <i>Ursus americanus</i>         | 8                       |
| American crow               | <i>Corvus brachyrhynchos</i>    | 4                       |
| American toad               | <i>Anaxyrus americanus</i>      | 1                       |
| Bald eagle                  | <i>Haliaeetus leucocephalus</i> | 1                       |
| Barred owl                  | <i>Strix varia</i>              | 6                       |
| Big brown bat               | <i>Eptesicus fuscus</i>         | 2                       |
| Black vulture               | <i>Coragyps atratus</i>         | 1                       |
| Blue jay                    | <i>Cyanocitta cristata</i>      | 2                       |
| Canadian goose              | <i>Branta canadensis</i>        | 8                       |
| Chipmunk                    | <i>Tamias striatus</i>          | 1                       |
| Common grackle              | <i>Quiscalus quiscula</i>       | 3                       |
| Common raven                | <i>Corvus corax</i>             | 1                       |
| Cooper's hawk               | <i>Accipiter cooperii</i>       | 2                       |
| Coyote                      | <i>Canis latrans</i>            | 4                       |
| Eastern box turtle          | <i>Terrapene carolina</i>       | 5                       |
| Eastern cottontail          | <i>Sylvilagus floridanus</i>    | 114                     |
| Eastern gray squirrel       | <i>Sciurus carolinensis</i>     | 31                      |
| Eastern mole                | <i>Scalopus aquaticus</i>       | 1                       |
| Eastern red bat             | <i>Lasiurus borealis</i>        | 2                       |
| Eastern screech-owl         | <i>Megascops asio</i>           | 1                       |
| Great blue heron            | <i>Ardea herodias</i>           | 2                       |
| Great horned owl            | <i>Bubo virginianus</i>         | 4                       |
| Grey fox                    | <i>Urocyon cinereoargenteus</i> | 2                       |
| Groundhog                   | <i>Marmota monax</i>            | 17                      |
| Horned grobe                | <i>Podiceps auritus</i>         | 1                       |
| House mouse                 | <i>Mus musculus</i>             | 5                       |
| Mallard                     | <i>Anas platyrhynchos</i>       | 1                       |
| Meadow vole                 | <i>Microtus pennsylvanicus</i>  | 7                       |
| Mourning dove               | <i>Zenaida macroura</i>         | 1                       |
| North American river otter  | <i>Lontra canadensis</i>        | 1                       |
| Northern red-bellied cooter | <i>Pseudemys rubriventris</i>   | 1                       |
| Norway rat                  | <i>Rattus norvegicus</i>        | 3                       |
| Porcupine                   | <i>Erethizon dorsatum</i>       | 2                       |

|                     |                               |     |
|---------------------|-------------------------------|-----|
| Northern raccoon    | <i>Procyon lotor</i>          | 117 |
| Red fox             | <i>Vulpes vulpes</i>          | 40  |
| Red-shouldered hawk | <i>Buteo lineatus</i>         | 5   |
| Red-tailed hawk     | <i>Buteo jamaicensis</i>      | 5   |
| Ring-billed gull    | <i>Larus delawarensis</i>     | 1   |
| Striped skunk       | <i>Mephitis mephitis</i>      | 22  |
| Snapping turtle     | <i>Chelydra serpentina</i>    | 3   |
| Turkey vulture      | <i>Cathartes aura</i>         | 1   |
| Virginia opossum    | <i>Didelphis virginiana</i>   | 86  |
| White-footed mouse  | <i>Peromyscus leucopus</i>    | 36  |
| White-tailed deer   | <i>Odocoileus virginianus</i> | 270 |
| Wild turkey         | <i>Meleagris gallopavo</i>    | 1   |
| Wisconsin turtle    | <i>Chrysemys picta</i>        | 1   |

**Table S2:** Tick-borne virus-serostatus in wildlife samples from each Health Planning Region of Virginia

| Health Region | Number tested | POWV-seropositive samples<br>n (%; 95% CI) |
|---------------|---------------|--------------------------------------------|
| Northwestern  | 429           | 23 (5.4; 3.2-7.5)                          |
| Northern      | 164           | 6 (3.7; 0.8-6.5)                           |
| Southwestern  | 212           | 114 (54; 47-60)                            |
| Central       | 3             | 0 (0; 0-0)                                 |
| Eastern       | 3             | 1 (33; 0-87)                               |
| Health Region | Number tested | BRBV-seropositive samples<br>n (%; 95% CI) |
| Northwestern  | 423           | 47 (11; 8.1-14.1)                          |
| Northern      | 165           | 6 (3; 0.4-5.6)                             |
| Southwestern  | 176           | 8 (4.5; 1.5-7.6)                           |
| Central       | 3             | 0 (0;0-0)                                  |
| Eastern       | 3             | 0 (0;0-0)                                  |
| Health Region | Number tested | HRTV-seropositive samples<br>n (%; 95% CI) |
| Northwestern  | 422           | 20 (4.7; 2.7-6.8)                          |
| Northern      | 164           | 3 (1.8; 0-3.9)                             |
| Southwestern  | 174           | 13 (7.4; 3.6-11.4)                         |
| Central       | 3             | 1(33%; 0-87)                               |
| Eastern       | 3             | 1 (33%; 0-87)                              |

**Table S3:** Tick-borne virus-serostatus in livestock samples from each Health Planning Region of Virginia

| Health Region | Number tested | Number of POWV-seropositive Samples<br>(%; 95% CI) | Number of BRBV-seropositive samples<br>(%; 95% CI) | Number of HRTV-seropositive samples<br>(%; 95% CI) |
|---------------|---------------|----------------------------------------------------|----------------------------------------------------|----------------------------------------------------|
| Northwestern  | 116           | 1 (0.9; 0-2.5)                                     | 3 (2.6; 0-5.5)                                     | 9 (7.8; 2.9-12.6)                                  |
| Northern      | 17            | 0 (0; 0-0)                                         | 0 (0; 0-0)                                         | 1 (5.9; 0-17.1)                                    |
| Southwestern  | 173           | 4 (2.3; 0-4.6)                                     | 0 (0; 0-0)                                         | 4 (2.3; 0-4.6)                                     |
| Central       | 164           | 0 (0; 0-0)                                         | 2 (1.2; 0-2.9)                                     | 24 (14.6; 9.2-20)                                  |
| Eastern       | 30            | 0 (0; 0-0)                                         | 1 (3.3; 0-9.8)                                     | 2 (6.6; 0-15.6)                                    |
| <b>Total</b>  | 500           | 5 (1; 0.1-1.9)                                     | 6 (1.2; 0.2-2.2)                                   | 40 (8; 5.6-10)                                     |
